# Supplementary material
Source: Springer Nature journal article supplement (https://www.springermedizin.de/resource/supplementary/12933_2009_193_MOESM5_ESM.pdf/9539800)

**A**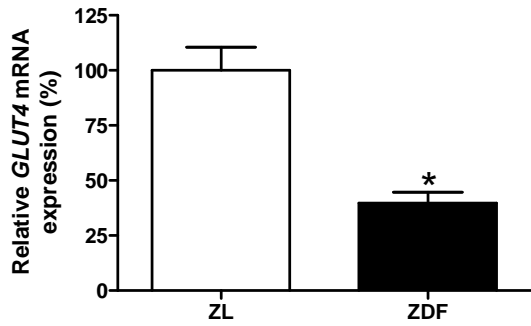**B**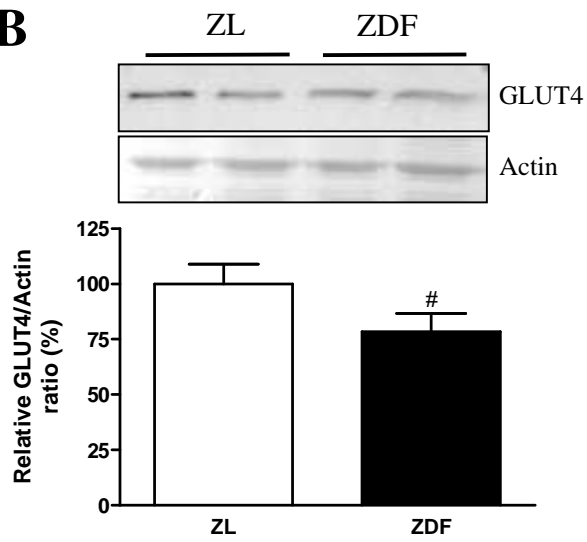**C**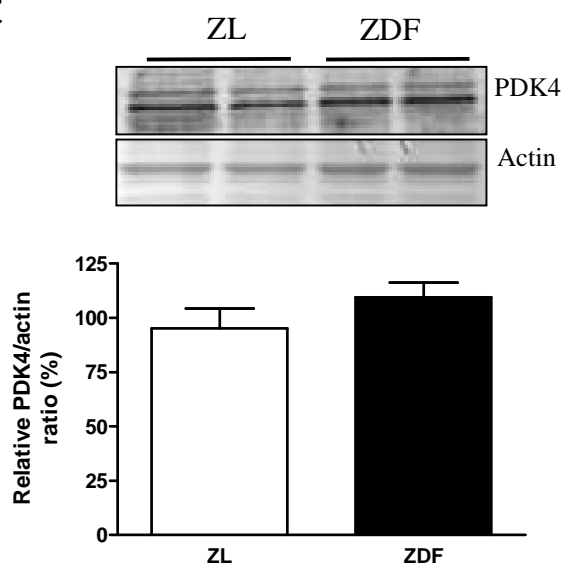**D**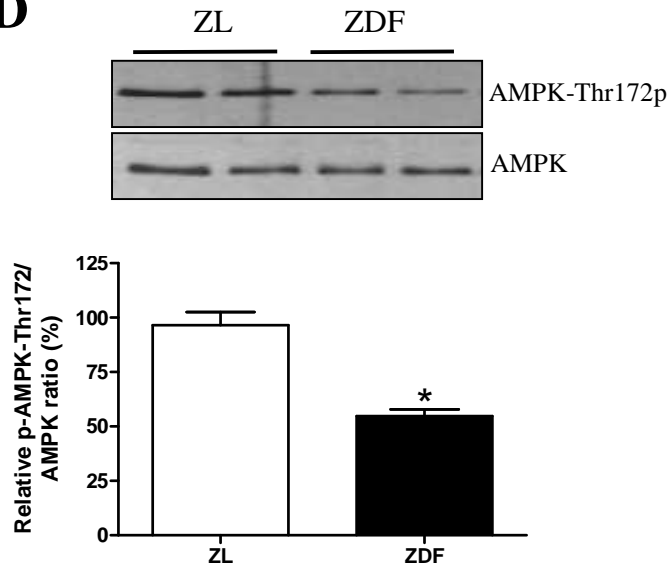**E**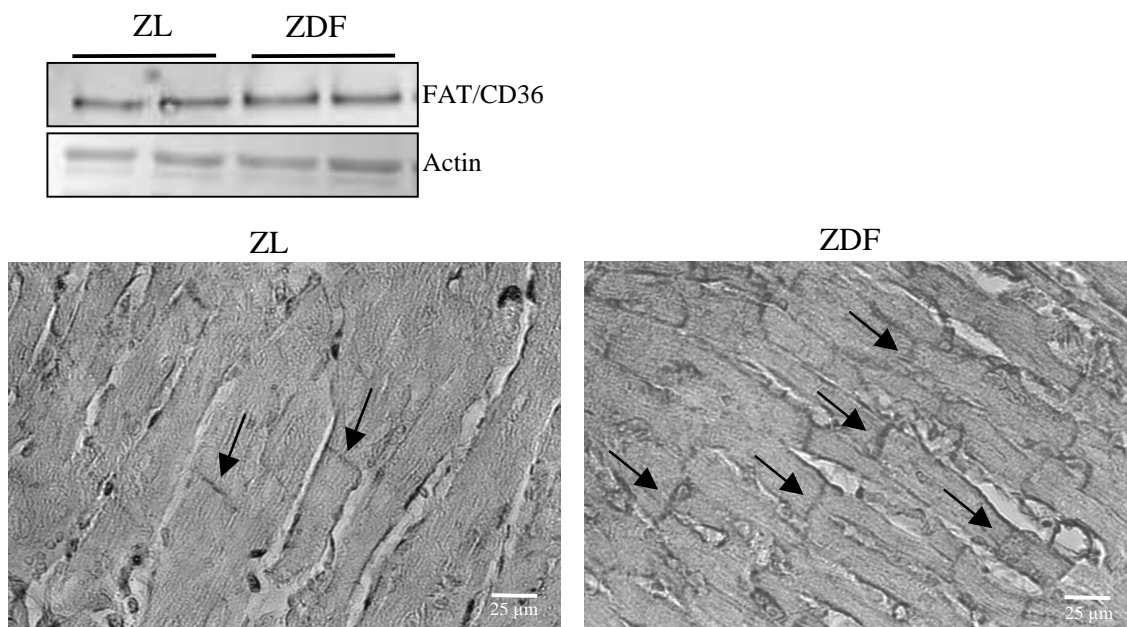

Supplement: MOESM5 [file 9539800]
